# Supplementary material
Source: HighWire-hosted journal article supplement (https://www.annfammed.org/highwire/filestream/7719/field_highwire_adjunct_files/1/BowerApp2.pdf)
Supplement: BowerApp2.pdf [file BowerApp2.pdf]

Online Supplementary Material

Cheraghi-Sohi S, Hole A, Mead N, et al. What patients want from primary care consultations: a discrete choice experiment to identify patient priorities. *Ann Fam Med*. 2008;6(2):107-115.

<http://www.annfammed.org/cgi/content/full/6/2/107/DC1>

---

## Supplemental Appendix 2. Models With Statistical Interaction Terms

A previous systematic review suggested that younger patients would prefer short waiting times, choice of appointments, high-quality technical care, and involvement in decision making; lower-income patients would place greater emphasis on cost and less on involvement in decision making; and patients with long-term illness would place greater emphasis on continuity of care.<sup>1</sup>

### Generic Questionnaire

In the model with statistical interaction terms, cost was less important to older patients but more important to patients with lower incomes. Among older patients a thorough physical examination was more highly valued, whereas patients with a long-term illness placed higher value on seeing a physician who knew them well.

### Patient-Centered Care Questionnaire

In the model with statistical interaction terms, cost was less important to patients with a long-term illness but more important to patients with lower incomes. Among older patients, seeing a physician who knew them well was more highly valued, and both older patients and those with long-term conditions placed higher value on seeing a physician who was interested in their own ideas about what was wrong.

### Statistical Interactions

For both questionnaires, the model with statistical interaction terms fit the data significantly better than the model with no interaction terms (using a likelihood ratio test), but adding more terms did not increase model fit.

### Reference

1. Jung H, Baerveldt C, Olesen F, Grol R, Wensing M. Patient characteristics as predictors of primary health care preferences: a systematic literature analysis. *Health Expect*. 2003;6(2):160-181.

## Online Supplementary Data

<http://www.annfammed.org/cgi/content/full/6/2/107/DC1>

| <b>Generic Questionnaire</b>                                                                                                                                                                                                                                             |                     |          |
|--------------------------------------------------------------------------------------------------------------------------------------------------------------------------------------------------------------------------------------------------------------------------|---------------------|----------|
| <b>Attribute, Interaction, or Variable</b>                                                                                                                                                                                                                               | <b>Statistic</b>    |          |
| Attribute                                                                                                                                                                                                                                                                | <b>Coefficient</b>  | <b>t</b> |
| Waiting time, days                                                                                                                                                                                                                                                       | -0.114 <sup>a</sup> | -20.06   |
| Cost, £                                                                                                                                                                                                                                                                  | -0.035 <sup>a</sup> | -22.47   |
| Doctor knows you well                                                                                                                                                                                                                                                    | 0.159 <sup>a</sup>  | 7.15     |
| You get a choice of appointment times                                                                                                                                                                                                                                    | 0.115 <sup>a</sup>  | 6.74     |
| Doctor is warm and friendly                                                                                                                                                                                                                                              | 0.134 <sup>a</sup>  | 7.79     |
| Doctor gives you a thorough physical examination                                                                                                                                                                                                                         | 0.570 <sup>a</sup>  | 19.00    |
| Interaction                                                                                                                                                                                                                                                              |                     |          |
| Cost * age 40-65 years <sup>b</sup>                                                                                                                                                                                                                                      | 0.008 <sup>a</sup>  | 3.92     |
| Cost * age > 65 years <sup>b</sup>                                                                                                                                                                                                                                       | 0.007 <sup>c</sup>  | 2.99     |
| Cost * household income ≤£20,000 <sup>d</sup>                                                                                                                                                                                                                            | -0.006 <sup>a</sup> | -3.78    |
| Doctor knows you well * long-term illness <sup>e</sup>                                                                                                                                                                                                                   | 0.084 <sup>c</sup>  | 2.57     |
| Thorough physical examination * age 40-65 years <sup>b</sup>                                                                                                                                                                                                             | 0.081 <sup>c</sup>  | 2.07     |
| Thorough physical examination * age > 65 years <sup>b</sup>                                                                                                                                                                                                              | 0.210 <sup>a</sup>  | 4.70     |
| Constant                                                                                                                                                                                                                                                                 | 0.004               | 0.22     |
| Variable                                                                                                                                                                                                                                                                 | <b>Value</b>        |          |
| Number of responses                                                                                                                                                                                                                                                      | 8,511               |          |
| Number of respondents                                                                                                                                                                                                                                                    | 536                 |          |
| $\rho^2$                                                                                                                                                                                                                                                                 | 0.318               |          |
| Likelihood ratio test, model with no interactions ( <i>P</i> value)                                                                                                                                                                                                      | 62.81 (< .001)      |          |
| Likelihood ratio test, model with full set of interactions ( <i>P</i> value)                                                                                                                                                                                             | 7.89 (.85)          |          |
| <sup>a</sup> <i>P</i> < .0001.<br><sup>b</sup> Reference category is age younger than 40 years.<br><sup>c</sup> <i>P</i> < .05.<br><sup>d</sup> Reference category is household income greater than £20,000.<br><sup>e</sup> Reference category is no long-term illness. |                     |          |

## Online Supplementary Data

<http://www.annfammed.org/cgi/content/full/6/2/107/DC1>

| <b>Patient-Centered Care Questionnaire</b>                                                                                                                                                                                                                               |                     |          |
|--------------------------------------------------------------------------------------------------------------------------------------------------------------------------------------------------------------------------------------------------------------------------|---------------------|----------|
| <b>Attribute, Interaction, or Variable</b>                                                                                                                                                                                                                               | <b>Statistic</b>    |          |
|                                                                                                                                                                                                                                                                          | <b>Coefficient</b>  | <b>t</b> |
| <b>Attribute</b>                                                                                                                                                                                                                                                         |                     |          |
| Waiting time, days                                                                                                                                                                                                                                                       | -0.126 <sup>a</sup> | -21.96   |
| Cost, £                                                                                                                                                                                                                                                                  | -0.034 <sup>a</sup> | -27.35   |
| Doctor knows you well                                                                                                                                                                                                                                                    | 0.232 <sup>a</sup>  | 7.75     |
| Doctor is interested in your ideas                                                                                                                                                                                                                                       | 0.235 <sup>a</sup>  | 7.56     |
| Doctor asks about your social and emotional well-being                                                                                                                                                                                                                   | 0.224 <sup>a</sup>  | 12.77    |
| Doctor involves you in decision making                                                                                                                                                                                                                                   | 0.226 <sup>a</sup>  | 13.53    |
| <b>Interaction</b>                                                                                                                                                                                                                                                       |                     |          |
| Cost * long-term illness <sup>b</sup>                                                                                                                                                                                                                                    | 0.003 <sup>c</sup>  | 2.00     |
| Cost * household income < £20,000 <sup>d</sup>                                                                                                                                                                                                                           | -0.006 <sup>c</sup> | -3.33    |
| Doctor knows you well * age 40-65 years <sup>e</sup>                                                                                                                                                                                                                     | 0.058               | 1.49     |
| Doctor knows you well * age > 65 years <sup>e</sup>                                                                                                                                                                                                                      | 0.141 <sup>c</sup>  | 3.29     |
| Doctor is interested in your ideas * age 40-65 years <sup>e</sup>                                                                                                                                                                                                        | 0.082 <sup>c</sup>  | 2.09     |
| Doctor is interested in your ideas * age > 65 years <sup>e</sup>                                                                                                                                                                                                         | 0.097 <sup>c</sup>  | 2.15     |
| Doctor is interested in your ideas * long-term illness <sup>b</sup>                                                                                                                                                                                                      | -0.092 <sup>c</sup> | -2.66    |
| Constant                                                                                                                                                                                                                                                                 | -0.006              | -0.30    |
| <b>Variable</b>                                                                                                                                                                                                                                                          |                     |          |
|                                                                                                                                                                                                                                                                          | <b>Value</b>        |          |
| Number of responses                                                                                                                                                                                                                                                      | 8,184               |          |
| Number of respondents                                                                                                                                                                                                                                                    | 513                 |          |
| $\rho^2$                                                                                                                                                                                                                                                                 | 0.294               |          |
| Likelihood ratio test, model with no interactions ( <i>P</i> value)                                                                                                                                                                                                      | 32.65 (< .001)      |          |
| Likelihood ratio test, model with full set of interactions ( <i>P</i> value)                                                                                                                                                                                             | 13.21 (.35)         |          |
| <sup>a</sup> <i>P</i> < .0001.<br><sup>b</sup> Reference category is no long-term illness.<br><sup>c</sup> <i>P</i> < .05.<br><sup>d</sup> Reference category is household income greater than £20,000.<br><sup>e</sup> Reference category is age younger than 40 years. |                     |          |
